# Supplementary material
Source: PubMed Central journal article supplement (PMC10317193)
Supplement: NIHMS1757066-supplement-1.pdf [file NIHMS1757066-supplement-1.pdf]

## SUPPORTING INFORMATION

### **LHRH-Targeted Cisplatin-Loaded Magnetite Nanoclusters for Simultaneous MR Imaging and Chemotherapy of Ovarian Cancer**

Hemant M. Vishwasrao<sup>1, 2</sup>, Alyssa M Master<sup>2</sup>, Youn Gee Seo<sup>2</sup>, Xinming M. Liu<sup>1, 3</sup>, Nikorn. Pothayee<sup>4</sup>, Zhengyuan Zhou<sup>1</sup>, Dongfen Yuan<sup>2</sup>, Michael D. Boska<sup>5</sup>, Tatiana K. Bronich<sup>1</sup>, Richey M. Davis<sup>6§</sup>, Judy S. Riffle<sup>6‡</sup>, Marina Sokolsky-Papkov<sup>2\*</sup> and Alexander V. Kabanov<sup>2, 7\*</sup>

1. Center for Drug Delivery and Nanomedicine, Department of Pharmaceutical Sciences, College of Pharmacy, University of Nebraska Medical Center, Omaha, NE 68198 USA
2. Center for Nanotechnology in Drug Delivery, Molecular Pharmaceutics Division, Eshelman School of Pharmacy, University of North Carolina at Chapel Hill, Chapel Hill, NC 27599, USA
3. Department of Pharmacology and Experimental Neuroscience, University of Nebraska Medical Center, Omaha, NE 68198, USA
4. Laboratory of Functional and Molecular Imaging, National Institute of Neurological Disorders and Stroke, National Institutes of Health, Bethesda, MD 20892, USA
5. Department of Radiology, College of Medicine, University of Nebraska Medical Center, Omaha, NE 68198, USA
6. Macromolecules and Interfaces Institute, <sup>‡</sup>Department of Chemistry, and <sup>§</sup>Department of Chemical Engineering, Virginia Tech, Blacksburg, Virginia 24061, USA
7. Faculty of Chemistry, M.V. Lomonosov, Moscow State University, 119899 Moscow, Russia

\* Corresponding Authors: M.S., A.V.K., Center for Nanotechnology in Drug Delivery, UNC Eshelman School of Pharmacy, University of North Carolina at Chapel Hill, Marsico Hall, Room 2012, Campus Box 7362, Chapel Hill, NC 27599-7362, Tel: +1 (919) 537-3800. E-mail: msokolsk@email.unc.edu; kabanov@email.unc.edu

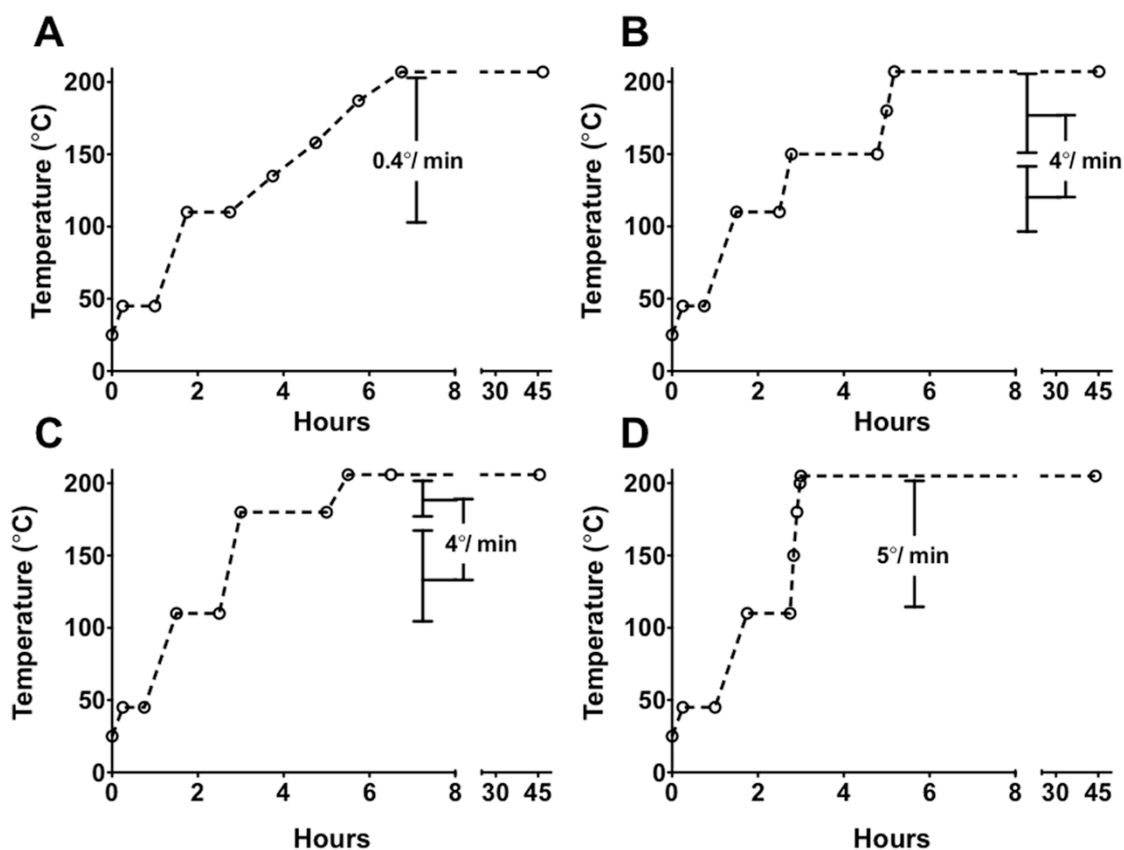

**Figure S1.** Various heating regimes during the synthesis of MNPs by thermal decomposition of  $\text{Fe}(\text{acac})_3$ .

**Table S1.** Physicochemical characteristics of MNCs stabilized by homopolymer PLD, PLE, and  $\text{PLD}_{100}\text{-b-PEG}_{113}$ .

| Formulation <sup>a</sup>                      | Abbreviation           | DLS Characteristics <sup>b</sup> |       |                         |
|-----------------------------------------------|------------------------|----------------------------------|-------|-------------------------|
|                                               |                        | $D_{\text{eff}}$ (nm)            | PDI   | $\zeta$ -potential (mV) |
| PLE <sub>100</sub> /MNP                       | hE <sub>100</sub> -MNC | 27.3                             | 0.171 | -34.6                   |
| PLD <sub>100-b</sub> -PEG <sub>113</sub> /MNP | D <sub>100</sub> -MNC  | 94.8                             | 0.189 | -24.7                   |
| PLD <sub>100</sub> /MNP                       | hD <sub>100</sub> -MNC | 67.2                             | 0.168 | -47.2                   |

(a) The size of the MNPs in all formulations was  $7.3 \pm 4$  nm as quantified by Image J software from TEM images.

(b) DLS characteristics were measured in de-ionized (DI) water at 1 mg/ml MNCs at 25°C.



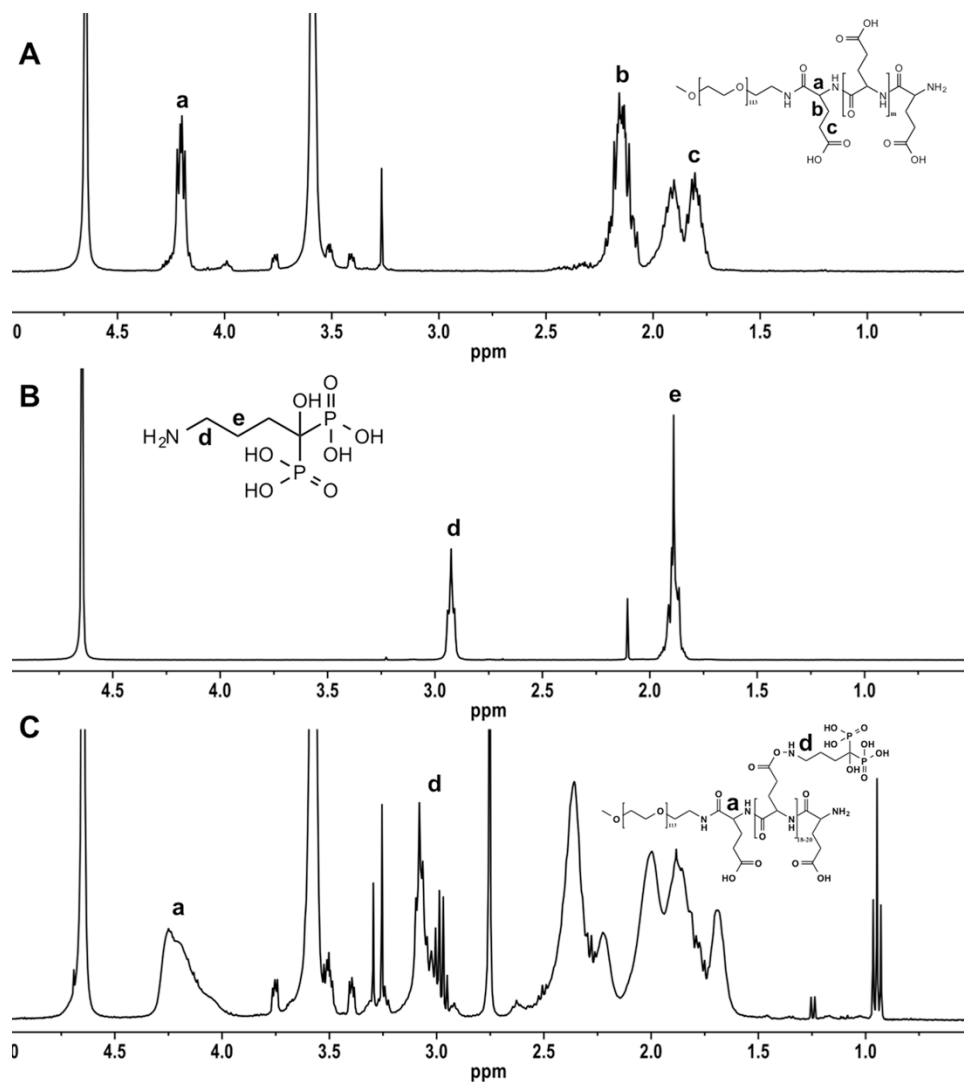

**Figure S3.**  $^1\text{H-NMR}$  in  $\text{D}_2\text{O}$  of **(A)**  $\text{PLE}_{50}\text{-}b\text{-PEG}_{113}$ , **(B)** ALN and **(C)** ALN-modified  $\text{PLE}_{50}\text{-}b\text{-PEG}_{113}$ . Peak assignments are as follows: **(A)**  $\delta$  ppm= 1.85 (2H, m,  $-\text{CH}_2-$ ; c), 2.2 (2H, m,  $\text{CH}_2$ ; b), 4.2 (H, t,  $-\text{CH}-$ ; a); **(B)**  $\delta$  ppm= 1.88 (2H, m,  $-\text{CH}_2-$ ; e), 2.9 (2H, t,  $-\text{CH}_2-$ ; d); **(C)**  $\delta$  ppm= 2.9 - 3.1 (2H, m,  $-\text{CH}_2-$ ; d), 4.28 (H, d,  $-\text{CH}-$ ; a).

**Table S2.** Quantitation of ALN conjugation by  $^1\text{H-NMR}$

| Formulation           | ALN units per chain ( $D_{\text{conj}}$ ) |
|-----------------------|-------------------------------------------|
| $A_6\text{-MNC}$      | 5.8                                       |
| $A_{12}\text{-MNC}$   | 10.7                                      |
| $A_{19}\text{-MNC-1}$ | 19.3                                      |
| $A_{19}\text{-MNC-2}$ | 18.5                                      |

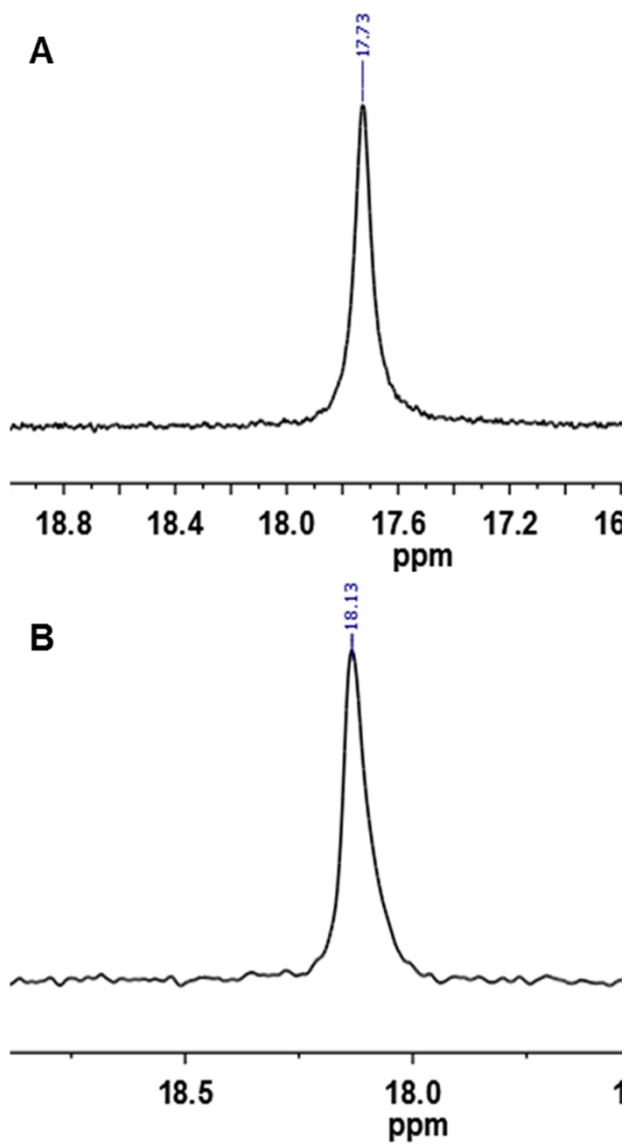

**Figure S4.**  $^{31}\text{P}$ -NMR in  $\text{D}_2\text{O}$  of **(A)** unconjugated ALN ( $\delta$  ppm: 17.73) and **(B)** ALN-modified  $\text{PLE}_{50}\text{-PEG}_{113}$  ( $\delta$  ppm: 18.13)

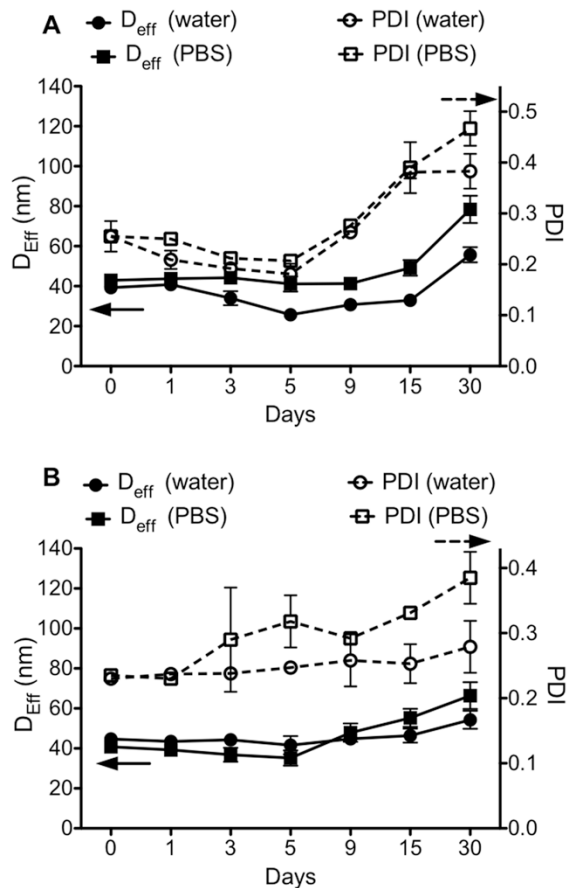

**Figure S5.** Colloidal stability of **(A)** A<sub>6</sub>-MNC and **(B)** A<sub>12</sub>-MNC formulations in DI water and PBS, pH 7.4 at RT.

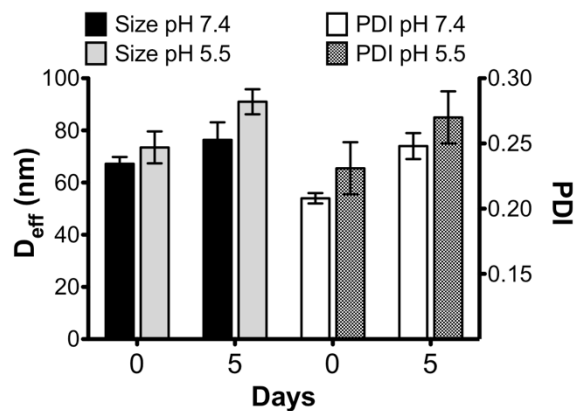

**Figure S6:** Colloidal stability of cisplatin loaded Pt-A<sub>19</sub>-MNC formulation before and after cisplatin release from the formulation. The particle size ( $D_{eff}$ ) of the samples used for release kinetics study (Figure 6) was determined by DLS before and at the end of the release study

**Table S3.**  $T_1$  and  $T_2$  relaxivity measurements of different formulations at 7T in DI water.

| Formulation               | $r_1$ ( $s^{-1} \cdot mM^{-1}$ ) | $r_2$ ( $s^{-1} \cdot mM^{-1}$ ) |
|---------------------------|----------------------------------|----------------------------------|
| A <sub>6</sub> -MNC       | 1.00 ± 0.11                      | 74.3 ± 4.2                       |
| Pt-A <sub>6</sub> -MNC    | na                               | na                               |
| A <sub>12</sub> -MNC      | 1.6 ± 0.28                       | 56 ± 1.6                         |
| Pt-A <sub>12</sub> -MNC   | 2.1 ± 0.04                       | 49.2 ± 3                         |
| A <sub>19</sub> -MNC-1    | 1.1 ± 0.3                        | 288.6 ± 5.8                      |
| Pt-A <sub>19</sub> -MNC-1 | 1.3 ± 3.11                       | 392.1 ± 2.04                     |
| A <sub>19</sub> -MNC-2    | 1.04 ± 0.48                      | 244.3 ± 3.8                      |
| Pt-A <sub>19</sub> -MNC-2 | 1.3 ± 0.11                       | 247 ± 3.7                        |
| Feridex                   | n.a.                             | 269.4                            |

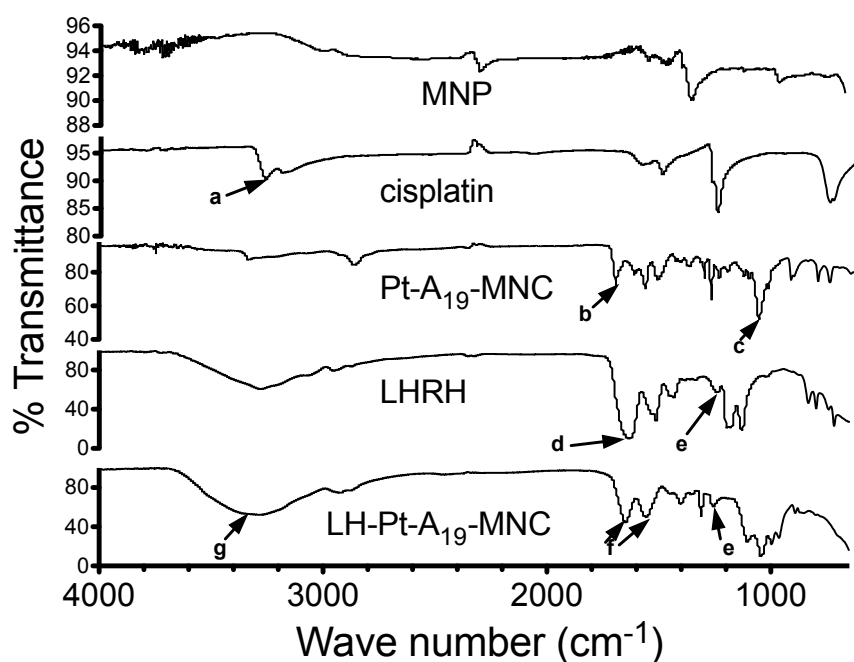

**Figure S7.** FTIR spectra of LHRH-conjugated Pt-A<sub>19</sub>-MNCs, the drug and various intermediates. Labels: **a** - 3280 cm<sup>-1</sup>: N-H stretch of the primary amine of cisplatin; **b** - 1730 cm<sup>-1</sup>: carbonyl stretch of carboxylic acid on the copolymer; **c** - 1110 cm<sup>-1</sup>: C-O stretch of PEG; **d** - 1650 cm<sup>-1</sup>: N-H bend of primary amines; **e** - 1260 cm<sup>-1</sup>: C-N stretch of aliphatic amines; **f** - 1660, 1580 cm<sup>-1</sup>: Signals of secondary amide bonds following conjugation of LHRH to the MNC; **g** - 3400 cm<sup>-1</sup>: N-H stretch of secondary amide bonds.

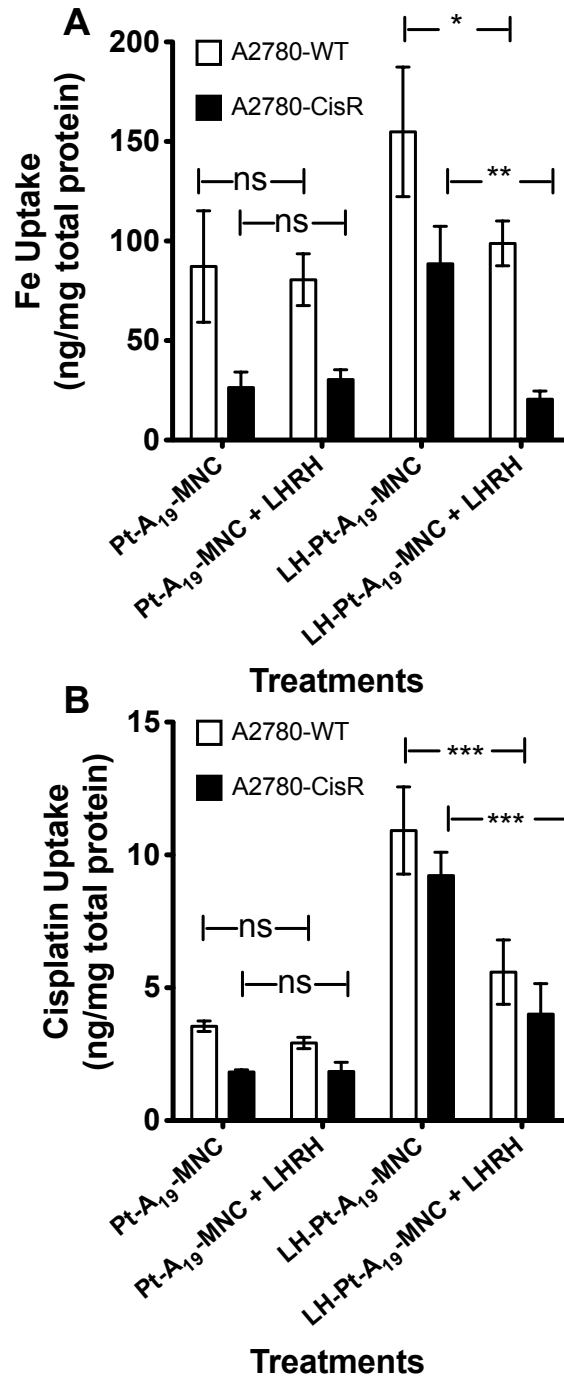

**Figure S8.** Inhibition of intracellular uptake of **(A)** Fe and **(B)** Cisplatin (Pt) in A2780-WT and A2780-CisR cells pre-incubated with D-Lys-6-LHRH peptide for 1h followed by 6h incubation with targeted and non-targeted PtMNC formulations. Statistical significance: \*  $p < 0.05$ , \*\*  $p < 0.01$ , \*\*\*  $p < 0.001$  ( $n=3$ ).



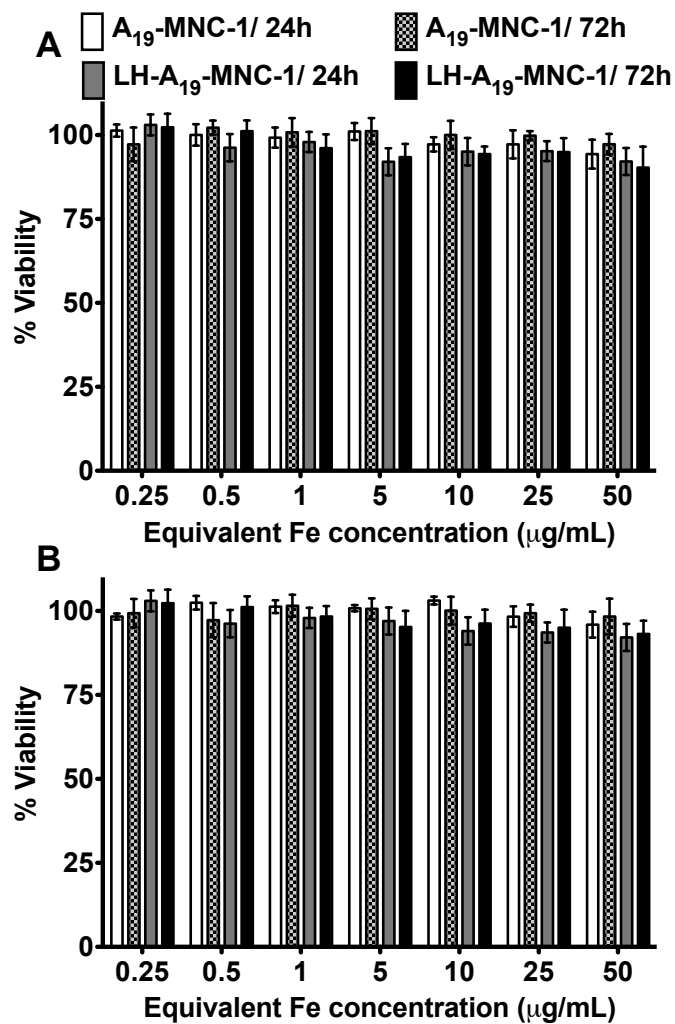

**Figure S9.** Formulation toxicity of unloaded non-targeted A<sub>19</sub>-MNC-1 and targeted LH-A<sub>19</sub>-MNC-1 formulations in **(A)** A2780-WT and **(B)** A2780-CisR cells. Cells were seeded in 96-well plates at a density of  $3 \cdot 10^3$  cells/well and incubated at 37°C in 5% CO<sub>2</sub>. After 24 h, they were treated with various concentrations of the said formulations and further incubated for 24h or 72h. At the end of each treatment period cell viability was measured by MTT assay. Mean  $\pm$  SD (n = 12).

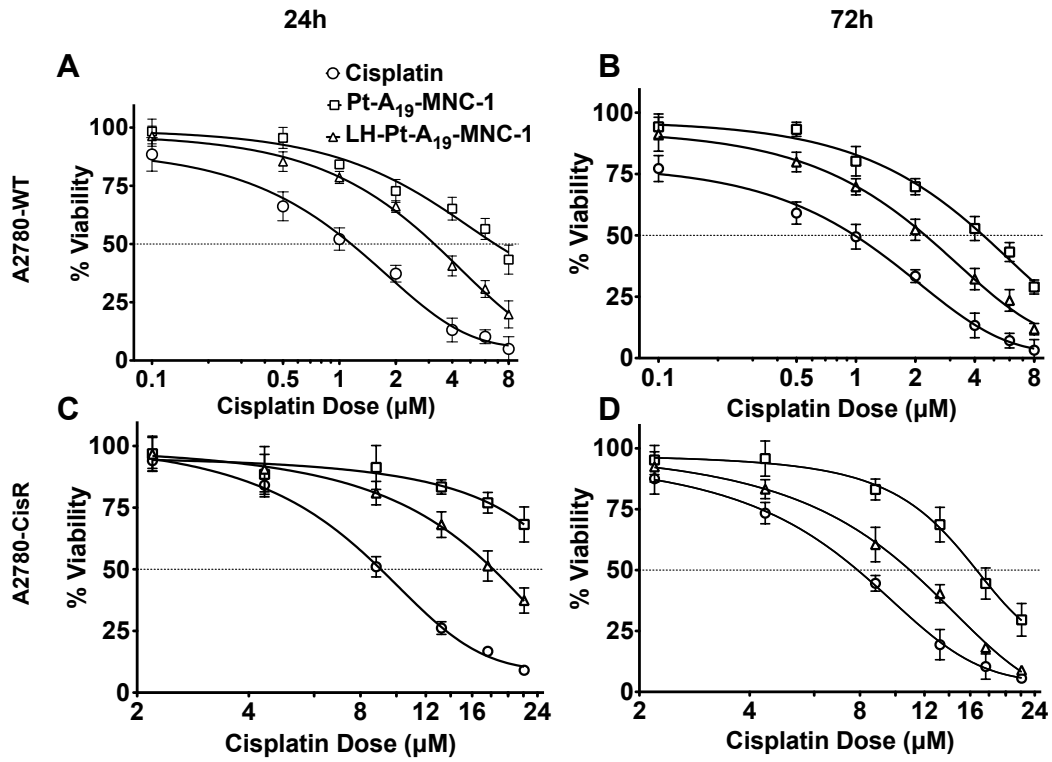

**Figure S10.** Cytotoxicity of cisplatin and LHRH-targeted and untargeted cisplatin-loaded MNCs in (A, B) A2780-WT and (C, D) A2780-CisR cells exposed for drugs for (A, C) 24 h and (B, D) 72 h. Data are mean  $\pm$  SD (n = 6).
